# Supplementary material
Source: Research Square preprint supplement (doi:10.21203/rs.3.rs-9792703/v1)
Supplement: Supplementary file 1 [file f120d1c64042e096a069f6e6.docx]

Supplementary table 1: Listing of all regulated pathways (with p-value < 0.05)

| **Ingénuity Canonical Pathways** | **Enrichment P value** | **% genes in pathway that are present** | **z-score** | **Annotated genes involved in the pathway** |
| --- | --- | --- | --- | --- |
| **Synaptic Long Term Depression** | 0.0282 | 9.89 | -2.333 | *GRIA1,IGF1,PDIA3,PLA2G12B,PLA2G1B,PLCE1,PPP2CA,PRKCA,PRKG1* |
| **Phospholipases** | 0.0048 | 17.60 | -2.236 | *LPL,NAPEPLD,PDIA3,PLA2G12B,PLA2G1B,PLCE1* |
| **Crosstalk between Dendritic Cells and Natural Killer Cells** | 0.0209 | 13.00 | -2 | *CD209,CD83,IL2RG,PRF1,RELB,TLR3* |
| **Sperm Motility** | 0.0427 | 8.53 | -1.89 | *CSF1R,EPHB2,EPHB3,KIT,PDIA3,PLA2G12B,PLA2G1B,PLCE1,PRKCA,PRKG1,TWF1* |
| **Aldosterone Signaling in Epithelial Cells** | 0.0219 | 10.30 | -1.633 | *DNAJC28,HSPA8,HSPB1,ICMT,NR3C2,PDIA3,PIK3R1,PLCE1,PRKCA* |
| **WNT/Ca+ pathway** | 0.0011 | 23.10 | -1.342 | *CREB5,GSK3B,PDIA3,PLCE1,PRKCA,RELB* |
| **Pyroptosis Signaling Pathway** | 0.0003 | 17.90 | -1.265 | *CASP8,CASP9,GSDME,NGFR,NLRP1,TLR1,TLR3,TLR8,TRAF3,TXNIP* |
| **Neuropathic Pain Signaling In Dorsal Horn Neurons** | 0.0089 | 14.00 | -1.134 | *FOS,GRIA1,KCNN2,PDIA3,PIK3R1,PLCE1,PRKCA* |
| **Role of Pattern Recognition Receptors in Recognition of Bacteria and Viruses** | 0.0219 | 10.30 | -1.134 | *C1QA,C5AR1,MAVS,PIK3R1,PRKCA,RELB,TLR1,TLR3,TLR8* |
| **Sphingosine-1-phosphate Signaling** | 0.0417 | 10.30 | -1.134 | *CASP8,CASP9,PDGFD,PDIA3,PIK3R1,PLCE1,SMPD2* |
| **tRNA Splicing** | 0.0112 | 21.10 | -1 | *GDE1,NAPEPLD,PDE8B,PDE9A* |
| **Retinoate Biosynthesis I** | 0.0186 | 18.20 | -1 | *RBP1,RBP7,RDH11,RDH16* |
| **Endothelin-1 Signaling** | 0.0182 | 9.73 | -0.905 | *CASP8,CASP9,EDN1,FOS,NAPEPLD,PDIA3,PIK3R1,PLA2G12B,PLA2G1B,PLCE1,PRKCA* |
| **CREB Signaling in Neurons** | 0.0132 | 8.13 | -0.894 | *ACKR4,ADRA1B,C5AR1,CCKAR,CMKLR1,CREB5,FFAR2,GHR,GRIA1,HGF,IGF1,LTB4R2,NGFR,*  *P2RY4,PDIA3,PIK3R1,PLCE1,PRKCA,PTGDR2,SSTR2* |
| **Phagosome Formation** | 0.0447 | 7.14 | -0.894 | *ACKR4,ADRA1B,C5AR1,CCKAR,CD209,CMKLR1,FFAR2,LTB4R2,MRC1,NAPEPLD,P2RY4,PIK3R1,*  *PLA2G12B,PLA2G1B,PRKCA,PTGDR2,SSTR2,TLR1,TLR3,TLR8* |
| **Macropinocytosis Signaling** | 0.0049 | 15.60 | -0.447 | *ABI1,CSF1R,HGF,MRC1,PDGFD,PIK3R1,PRKCA* |
| **UVA-Induced MAPK Signaling** | 0.0065 | 13.60 | -0.447 | *CASP9,FOS,PDIA3,PIK3R1,PLCE1,PRKCA,RPS6KA5,SMPD2* |
| **VEGF Family Ligand-Receptor Interactions** | 0.0417 | 11.10 | -0.447 | *FOS,NRP2,PIK3R1,PLA2G12B,PLA2G1B,PRKCA* |
| **PXR/RXR Activation** | 0.0135 | 13.00 | -0.378 | *CYP7A1,FOXA2,IGFBP1,NR0B2,NR3C1,PAPSS2,PPARGC1A* |
| **P2Y Purigenic Receptor Signaling Pathway** | 0.0251 | 10.70 | -0.378 | *CREB5,FOS,P2RY4,PDIA3,PIK3R1,PLCE1,PRKCA,RELB* |
| **Protein Kinase A Signaling** | 0.0178 | 8.29 | -0.258 | *AKAP1,CREB5,CREM,GDE1,GSK3B,NAPEPLD,NGFR,PDE8B,PDE9A,PDIA3,PHKA2,PLCE1,PPP1R14B,*  *PRKCA,PTPN12,PTPRB,RELB* |
| **Role of PKR in Interferon Induction and Antiviral Response** | 0.0117 | 10.90 | 0 | *CASP8,CASP9,FOS,HSPA8,MAVS,NLRP1,PDGFD,RELB,TLR3,TRAF3* |
| **Type II Diabetes Mellitus Signaling** | 0.0126 | 10.80 | 0 | *ACSL1,ACSL3,NGFR,PIK3R1,PPARG,PRKCA,RELB,SMPD2,SOCS2,SOCS3* |
| **Coronavirus Replication Pathway** | 0.0186 | 18.20 | 0 | *BAG3,CTSL,GSK3B,TUBB2B* |
| **Neuroinflammation Signaling Pathway** | 0.0251 | 8.29 | 0 | *CASP8,CREB5,CSF1R,FOS,GRIA1,GSK3B,PIK3R1,PLA2G12B,PLA2G1B,RELB,TLR1,TLR3,TLR8,TRAF3,VCAM1* |
| **Retinol Biosynthesis** | 0.0331 | 15.40 | 0 | *LPL,RBP1,RBP7,RDH11* |
| **Oxytocin Signaling Pathway** | 0.0398 | 8.39 | 0 | *CREB5,FOS,GSK3B,HSPB1,LPL,PIK3R1,PLA2G12B,PLA2G1B,PPARG,PRKCA,PRKG1,RELB* |
| **Breast Cancer Regulation by Stathmin1** | 0.0209 | 7.88 | 0.229 | *ACKR4,ADRA1B,ARHGEF1,C5AR1,CCKAR,CMKLR1,CREB5,FFAR2,HGF,IGF1,LTB4R2,P2RY4,PIK3R1,*  *PPP1R14B,PPP2CA,PRKCA,PTGDR2,SSTR2,TUBB2B* |
| **Synaptogenesis Signaling Pathway** | 0.0380 | 8.23 | 0.277 | *CPLX2,CREB5,EPHB2,EPHB3,GRIA1,GSK3B,HSPA8,NLGN4X,NRXN1,PIK3R1,RELN,SYT12,VLDLR* |
| **ERK/MAPK Signaling** | 0.0166 | 9.52 | 0.302 | *CREB5,FOS,HSPB1,MYCN,PIK3R1,PLA2G12B,PLA2G1B,PPARG,PPP1R14B,PPP2CA,PRKCA,RPS6KA5* |
| **14-3-3-mediated Signaling** | 0.0380 | 9.88 | 0.378 | *FOS,GSK3B,PDIA3,PIK3R1,PLCE1,PRKCA,TUBB2B,YAP1* |
| **Production of Nitric Oxide and Reactive Oxygen Species in Macrophages** | 0.0646 | 8.20 | 0.707 | *APOA4,APOF,FOS,NGFR,PIK3R1,PPP1R14B,PPP2CA,PRKCA,RELB,SPI1* |
| **G-Protein Coupled Receptor Signaling** | 0.0074 | 8.08 | 0.816 | *ACKR4,ADRA1B,C5AR1,CCKAR,CMKLR1,CREB5,FFAR2,FOS,GDE1,GSK3B,KCNN2,LTB4R2,MEGF6,*  *NAPEPLD,P2RY4,PDE8B,PDE9A,PIK3R1,PLCE1,PRKCA,PTGDR2,RELB,SSTR2,YAP1* |
| **Role of RIG1-like Receptors in Antiviral Innate Immunity** | 0.0068 | 19.20 | 1 | *CASP8,MAVS,RELB,TRAF3,TRIM25* |
| **Growth Hormone Signaling** | 0.0015 | 17.00 | 1.134 | *FOS,GHR,IGF1,PIK3R1,PRKCA,RPS6KA5,SOCS2,SOCS3* |
| **LPS/IL-1 Mediated Inhibition of RXR Function** | 0.0288 | 8.33 | 1.134 | *ACSL1,ACSL3,ALDH1L2,CPT2,CYP2C18,CYP7A1,FABP1,MAOA,NGFR,NR0B2,PAPSS2,PPARGC1A,SCARB1,SOD3* |
| **CLEAR Signaling Pathway** | 0.0162 | 8.37 | 1.213 | *ATP6V0A2,ATP6V1G1,BLOC1S1,CREB5,CTSD,GHR,GSK3B,HGF,IGF1,NGFR,PPARGC1A,PPP2CA,PRKCA,*  *TLR1,TLR3,TLR8,VPS11* |
| **Ceramide Signaling** | 0.0178 | 12.30 | 1.342 | *CTSD,FOS,NGFR,PIK3R1,PPP2CA,RELB,SMPD2* |
| **Prolactin Signaling** | 0.0562 | 10.30 | 1.342 | *FOS,NR3C1,PIK3R1,PRKCA,SOCS2,SOCS3* |
| **FXR/RXR Activation** | 0.0015 | 12.30 | NaN | *APOA4,APOF,CYP7A1,FETUB,FOXA1,FOXA2,LPL,NR0B2,PPARG,PPARGC1A,SCARB1,SLC4A2,VLDLR* |
| **IL-9 Signaling** | 0.0016 | 26.30 | NaN | *IL2RG,PIK3R1,RELB,SOCS2,SOCS3* |
| **Retinoate Biosynthesis II** | 0.0066 | 66.70 | NaN | *RBP1,RBP7* |
| **Role of Macrophages, Fibroblasts and Endothelial Cells in Rheumatoid Arthritis** | 0.0076 | 9.09 | NaN | *C5AR1,CREB5,FOS,GSK3B,NGFR,PDGFD,PDIA3,PIK3R1,PLCE1,PRKCA,SOCS3,TLR1,TLR3,TLR8,TRAF3,*  *VCAM1,WNT8A* |
| **The Visual Cycle** | 0.0100 | 30.00 | NaN | *RBP1,RBP7,RDH11* |
| **Granzyme B Signaling** | 0.0132 | 27.30 | NaN | *CASP8,CASP9,PRF1* |
| **Axonal Guidance Signaling** | 0.0282 | 7.63 | NaN | *ADAM9,ADAMTS10,ADAMTS2,EPHB2,EPHB3,GSK3B,IGF1,NGFR,NRP2,PDGFD,PDIA3,PIK3R1,PLCE1,*  *PLXNA2,PLXNB1,PRKCA,RTN4R,TUBB2B,WNT8A* |
| **MIF-mediated Glucocorticoid Regulation** | 0.0288 | 16.00 | NaN | *NR3C1,PLA2G12B,PLA2G1B,RELB* |
| **TR/RXR Activation** | 0.0288 | 11.10 | NaN | *CYP7A1,LDLR,NCOA4,PIK3R1,PPARGC1A,SCARB1,SYT12* |
| **Folate Transformations I** | 0.0295 | 33.30 | NaN | *MTHFD1,MTHFR* |
| **Atherosclerosis Signaling** | 0.0316 | 10.30 | NaN | *APOA4,APOF,LPL,PDGFD,PLA2G12B,PLA2G1B,RELB,VCAM1* |
| **Mitochondrial L-carnitine Shuttle Pathway** | 0.0316 | 20.00 | NaN | *ACSL1,ACSL3,CPT2* |
| **TWEAK Signaling** | 0.0468 | 13.80 | NaN | *CASP8,CASP9,RELB,TRAF3* |
| **Role of IL-17F in Allergic Inflammatory Airway Diseases** | 0.0468 | 13.80 | NaN | *CREB5,IGF1,RELB,RPS6KA5* |
| **Protein Citrullination** | 0.0479 | 100.00 | NaN | *PADI2* |
| **Thio-molybdenum Cofactor Biosynthesis** | 0.0479 | 100.00 | NaN | *MOCOS* |
| **Sulfate Activation for Sulfonation** | 0.0479 | 100.00 | NaN | *PAPSS2* |
| **Thyroid Hormone Biosynthesis** | 0.0479 | 100.00 | NaN | *CTSD* |
| **Acetate Conversion to Acetyl-CoA** | 0.0479 | 100.00 | NaN | *ACSL1* |

Supplementary table 2: Fold change of genes presented in the figures 2

Vitamin D3 metabolism

|  | **P value  (25-OH-D3 Diet vs VitD3 Diet)** | **Fold change (25-OH-D3 Diet vs VitD3 Diet)** |
| --- | --- | --- |
| CYP24A1 | 0.004 | 3.00 |
| GHr | 0.002 | -1.67 |
| IGF1 | 0.013 | -1.65 |
| IGFBP1 | 0.011 | 3.16 |
| IGFBP1A | 0.003 | 1.94 |
| PGC1α = PPARγC1α | 0.046 | 1.72 |
| PTH2r | 0.001 | -2.67 |

Supplementary table 3: Fold change of genes presented in the figures 3

Ferroptosis mechanism

|  | **P value  (25-OH-D3 Diet vs VitD3 Diet)** | **Fold change (25-OH-D3 Diet vs VitD3 Diet)** |
| --- | --- | --- |
| ACACβ = ACC | 0.028 | -1.71 |
| ACSL3 | 0.008 | 5.77 |
| FTH1 | 0.020 | 3.13 |
| HSPB1 | 0.010 | 1.94 |
| LOX | 0.002 | -2.56 |
| NCOA4 | 0.009 | -1.81 |
| STEAP2 | 0.015 | 1.78 |
| YAP1 | 0.037 | 1.62 |

Supplementary table 4: Fold change of genes presented in the figures 4

Cholesterol and bile acid metabolism

|  | **P value  (25-OH-D3 Diet vs VitD3 Diet)** | **Fold change (25-OH-D3 Diet vs VitD3 Diet)** |
| --- | --- | --- |
| APOA4 | 0.016 | -2.21 |
| APOF | 0.020 | 1.89 |
| CYP7A1 | 0.003 | -2.13 |
| LDLr | 0.043 | -1.55 |
| LDLRAP1 | 0.037 | -1.68 |
| LPL | 0.023 | 1.98 |
| SCARB1 = SRB1 | 0.034 | 1.54 |
| VLDLR | 0.013 | -2.01 |
